# Supplementary material for: Alkali-Etched NiCoAl-LDH with Improved Electrochemical Performance for Asymmetric Supercapacitors
Source: MDPI journal article supplement (doi:10.3390/nano13071192), 2023-03-27
Supplement: s1 [file s1]

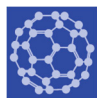

Supporting Information

# Alkali-Etched NiCoAl-LDH with Improved Electrochemical Performance for Asymmetric Supercapacitors

Liyin Hou <sup>1,2</sup>, Xufeng Zhou <sup>2</sup>, Lina Kong <sup>1</sup>, Zhipeng Ma <sup>1</sup>, Li Su <sup>1</sup>, Zhaoping Liu <sup>2,\*</sup>,<sup>†</sup> and Guangjie Shao <sup>1,3,†\*</sup>

<sup>1</sup> College of Environmental and Chemical Engineering, Yanshan University, Qinhuangdao 066004, China

<sup>2</sup> Key Laboratory of Graphene Technologies and Applications of Zhejiang Province and Advanced Li-Ion Battery Engineering Laboratory, Ningbo Institute of Materials Technology & Engineering, Chinese Academy of Sciences, Zhejiang 315201, China

<sup>3</sup> State Key Laboratory of Metastable Materials Science and Technology, Yanshan University, Qinhuangdao 066004, China

\* Correspondence: liuzp@nimte.ac.cn (Z.L.); shaoguangjie@ysu.edu.cn (G.S.)

† These authors contributed equally to this work.

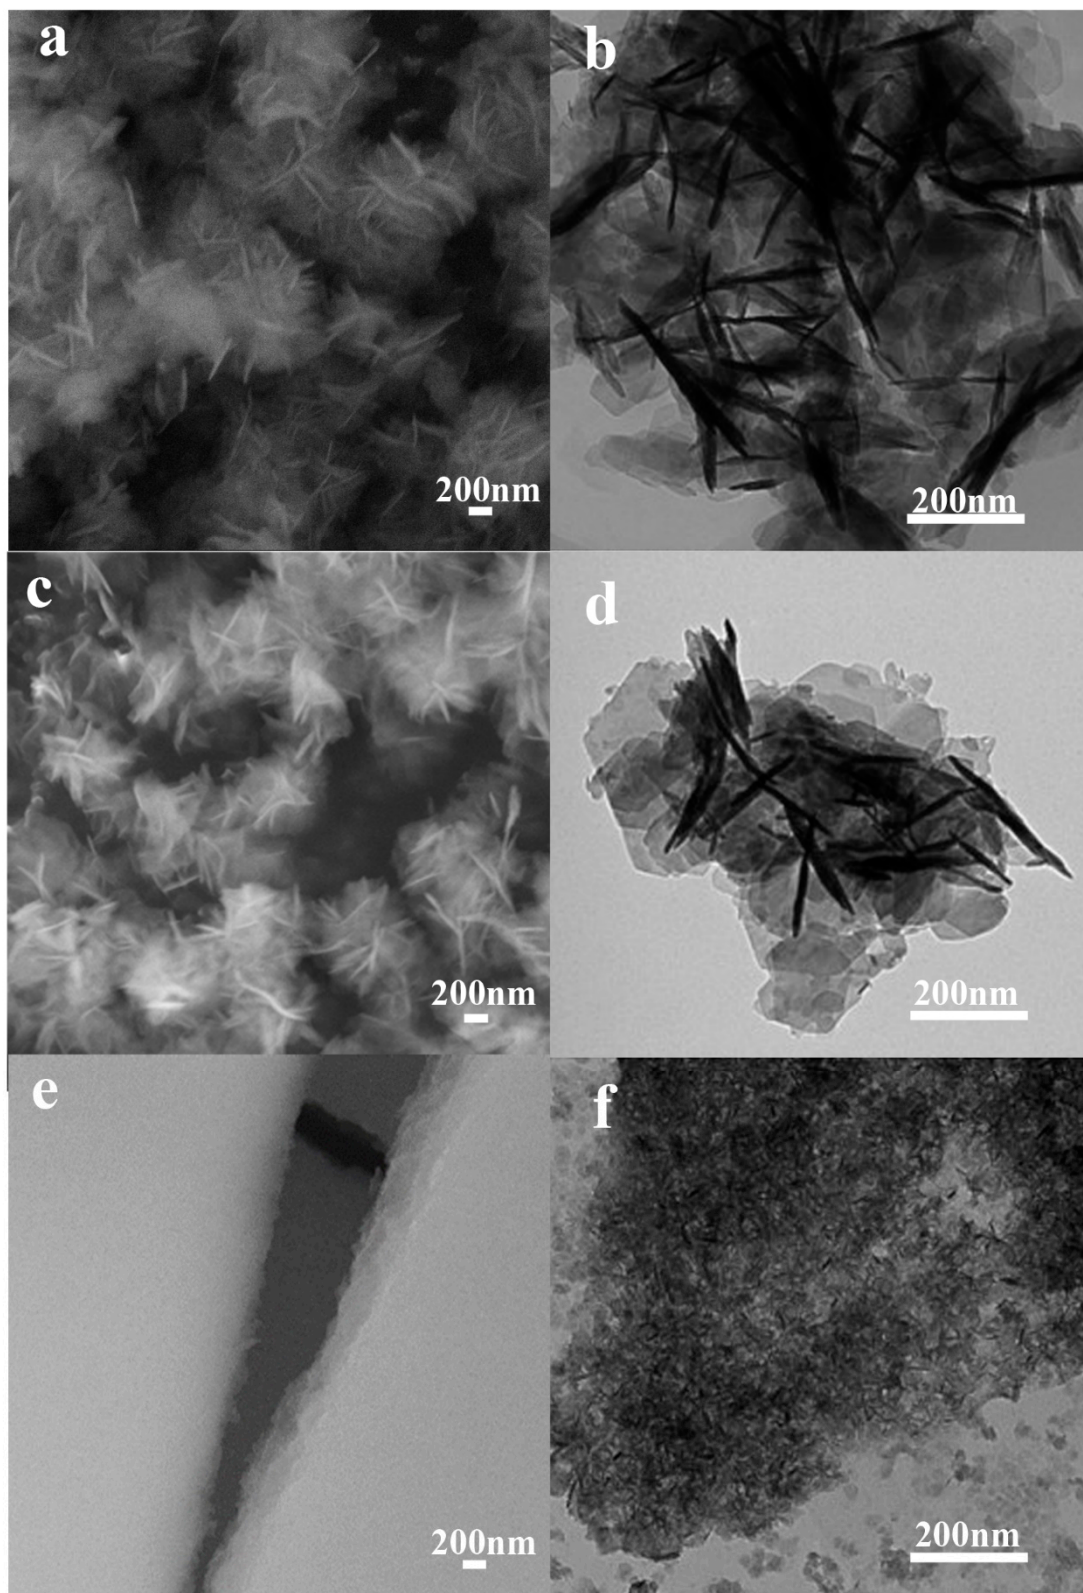

**Figure S1.** (a) SEM of NiCoAl-921, (b) TEM of NiCoAl-921; (c) SEM of 6M NaOH etched NiCoAl-LDH, (d) TEM of 6M NaOH etched NiCoAl-LDH; (e) SEM of 10 M NaOH etched NiCoAl-LDH, (f) TEM of 10 M NaOH etched NiCoAl-LDH.

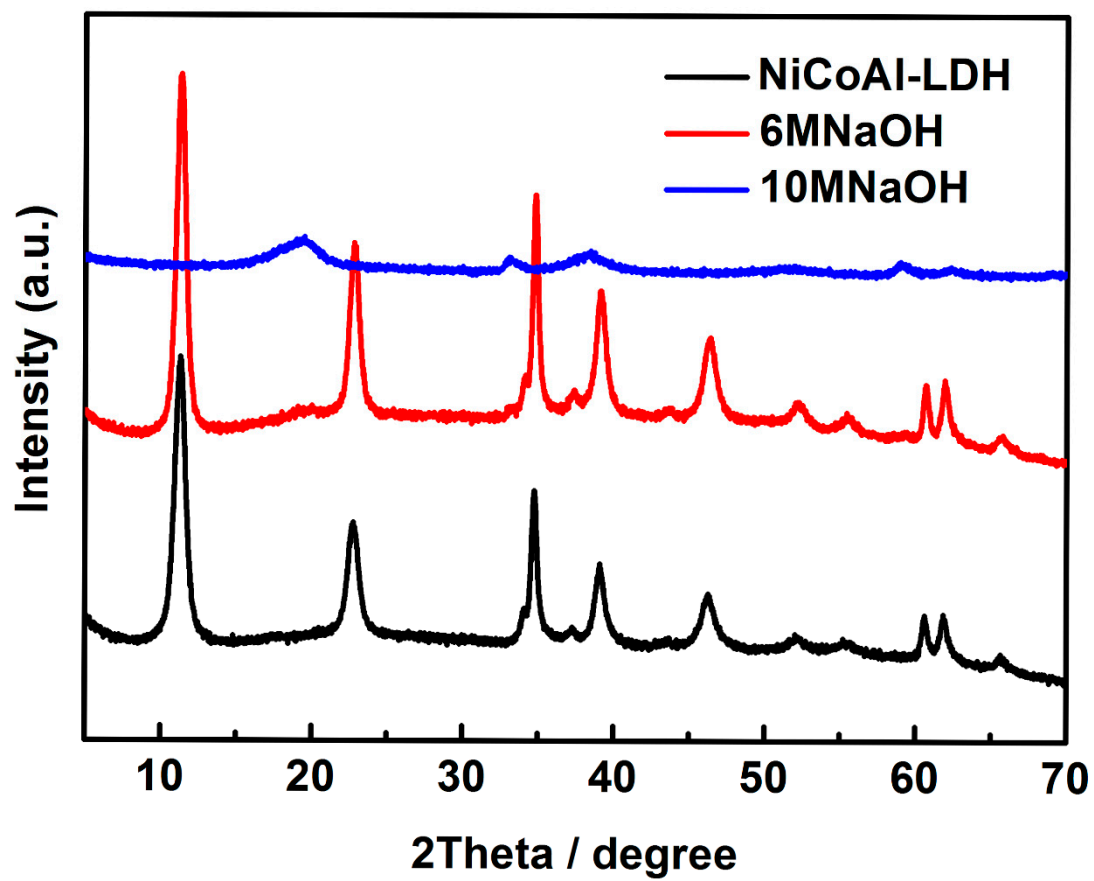

**Figure S2.** XRD pattern of alkali etaching NiCoAl-LDH with different concentration.
